# Supplementary material for: Molecular jackhammers induce intracellular calcium release and skeletal muscle contraction by vibronic-driven action
Source: Royal Society of Chemistry journal article supplement (doi:10.1039/d5sc09717g), 2026-04-13
Supplement: d5sc09717g1.pdf [file d5sc09717g1.pdf]

### Description of Supporting Videos

Supplementary Video 1: Localized calcium responses in HEK293 cells treated with **3p** (2  $\mu\text{M}$ ) and Fluo-4 (2  $\mu\text{M}$ ) stimulated by 640-nm light for 250 ms.

Supplementary Video 2: Localized calcium responses in C2C12 myotubes treated with **3p** (2  $\mu\text{M}$ ) and Fluo-4 (2  $\mu\text{M}$ ) stimulated by 640-nm light for 1.5 s.

Supplementary Video 3: Brightfield of C2C12 myotubes treated with **3p** (2  $\mu\text{M}$ ) and Fluo-4 (2  $\mu\text{M}$ ) stimulated by 640-nm light for 1.5 s.

Supplementary Video 4: Brightfield after image subtraction method of C2C12 myotubes treated with **3p** (2  $\mu\text{M}$ ) and Fluo-4 (2  $\mu\text{M}$ ) stimulated by 640-nm light for 1.5 s.

Supplementary Video 5: Localized calcium responses in *Hydra* treated with **3p** (6  $\mu\text{M}$ ) and 640-nm light for 3 s.

Supplementary Video 6: Localized calcium responses in *Hydra* treated with DMSO and 640-nm light for 3 s.
